# Supplementary material
Source: publisher figshare collection journal article supplement (https://karger.figshare.com/articles/dataset/_/5241382)
Supplement: Supplementary file 2 [file 1]

In the article by Duelsner et al. 'Granulocyte Colony-Stimulating Factor Improves Cerebrovascular Reserve Capacity by Enhancing Collateral Growth in the Circle of Willis' (Cerebrovasc Dis 2012;33:419–429), the authors list and sources of funding were not completely published. The full authors list and all sources of funding are listed below.

André Duelsner<sup>a</sup> Nora Gatzke<sup>a</sup> Johanna Glaser<sup>a</sup> Philipp Hillmeister<sup>a</sup>  
Meijing Li<sup>a</sup> Eun-Ji Lee<sup>a</sup> Kerstin Lehmann<sup>a</sup> Daniel Urban<sup>b</sup> Heike Meyborg<sup>b</sup>  
Philipp Stawowy<sup>b</sup> Andreas Busjahn<sup>c</sup> Stephanie Nagorka<sup>a</sup>  
Anja Bondke Persson<sup>d</sup> Rico Laage<sup>e</sup> Armin Schneider<sup>e</sup> Ivo R. Buschmann<sup>a</sup>

<sup>a</sup> Department of Internal Medicine, Cardiology and Angiology, Richard Thoma Laboratories for Arteriogenesis, Center for Cardiovascular Research and Experimental and Clinical Research Center, Charité – Universitätsmedizin Berlin,

<sup>b</sup> Department of Internal Medicine/Cardiology, German Heart Center Berlin,

<sup>c</sup> HealthTwiSt GmbH Berlin, <sup>d</sup> Institute of Physiology, Charité – Universitätsmedizin Berlin, Berlin, and <sup>e</sup> SYGNIS Bioscience, Heidelberg, Germany

**Sources of Funding**

This study was supported by Art.Net., Deutsche Forschungsgemeinschaft, Germany (grant DFG BU1141/4-2), and the Volkswagen Foundation, Germany.

The funders had no role in study design, data collection and analysis, decision to publish, or the preparation of the manuscript.

Additional funding was received by SYGNIS Bioscience (Heidelberg, Germany), which kindly provided the granulocyte colony-stimulating factor (Filgrastim).

We apologize for these errors.
